# Supplementary material for: Alkaline Phosphatase and Parathyroid Hormone Levels: International Variation and Associations With Clinical Outcomes in the DOPPS
Source: PubMed Central journal article supplement — Kidney Int Rep. 2024 Jan 11;9(4):863–76. doi: 10.1016/j.ekir.2024.01.002 (PMC11101738; doi:10.1016/j.ekir.2024.01.002), 2024-01-11
Supplement: mmc1.pdf [file mmc1.pdf]

## Supplementary Materials

### Table of contents

**Supplementary Figure S1.** Flow chart of inclusion/exclusion criteria. DOPPS = Dialysis Outcomes and Practice Patterns Study; phase 3-7: 2005-2022; vintage = time since dialysis initiation; ALP = alkaline phosphatase; ALT = alanine transaminase; AST = aspartate transferase; CRP = C-reactive protein; PTH = parathyroid hormone.

**Supplementary Figure S2.** Distribution of raw (not normalized) values of (A) ALP, and (B) PTH, by region and race. ALP = alkaline phosphatase; PTH = parathyroid hormone.

**Supplementary Figure S3.** Distribution of facility upper normal limit of (A) ALP, and (B) PTH by region. ALP = alkaline phosphatase; PTH = parathyroid hormone.

**Supplementary Figure S4.** Distribution of normalized ALP, by normalized PTH. ALP = alkaline phosphatase; PTH = parathyroid hormone

**Supplementary Figure S5.** Normalized ALP by categories of normalized PTH by (A) primary cause of ESRD, (B) ADPKD, (C) diabetes, (D) CRP, (E) serum calcium, (F) serum phosphorus, (G) cinacalcet, and (H) active vitamin D. ALP = alkaline phosphatase; ADPKD = adult polycystic kidney disease; CRP = C-reactive protein; ESRD = end-stage renal disease; PTH = parathyroid hormone.

**Supplementary Table S1.** Patient characteristics, by normalized ALP and normalized PTH, within each region and race

**Supplementary Table S2.** Adjusted associations (HR, 95% CI) between normalized ALP, normalized PTH, and time-to-event clinical outcomes, by level of adjustment

**Supplementary Table S3.** Akaike Information Criteria for adjusted Cox models including normalized PTH vs. normalized ALP

**Supplementary Table S4.** Sample size in each cell of the analysis (Figure 2) of the combined associations between normalized ALP, normalized PTH, and time-to-event clinical outcomes

### Modified STROBE Statement

### Supplementary Figure S1

Flow chart of inclusion/exclusion criteria. DOPPS = Dialysis Outcomes and Practice Patterns Study; phase 3-7: 2005-2022; vintage = time since dialysis initiation; ALP = alkaline phosphatase; ALT = alanine transaminase; AST = aspartate transferase; CRP = C-reactive protein; PTH = parathyroid hormone.

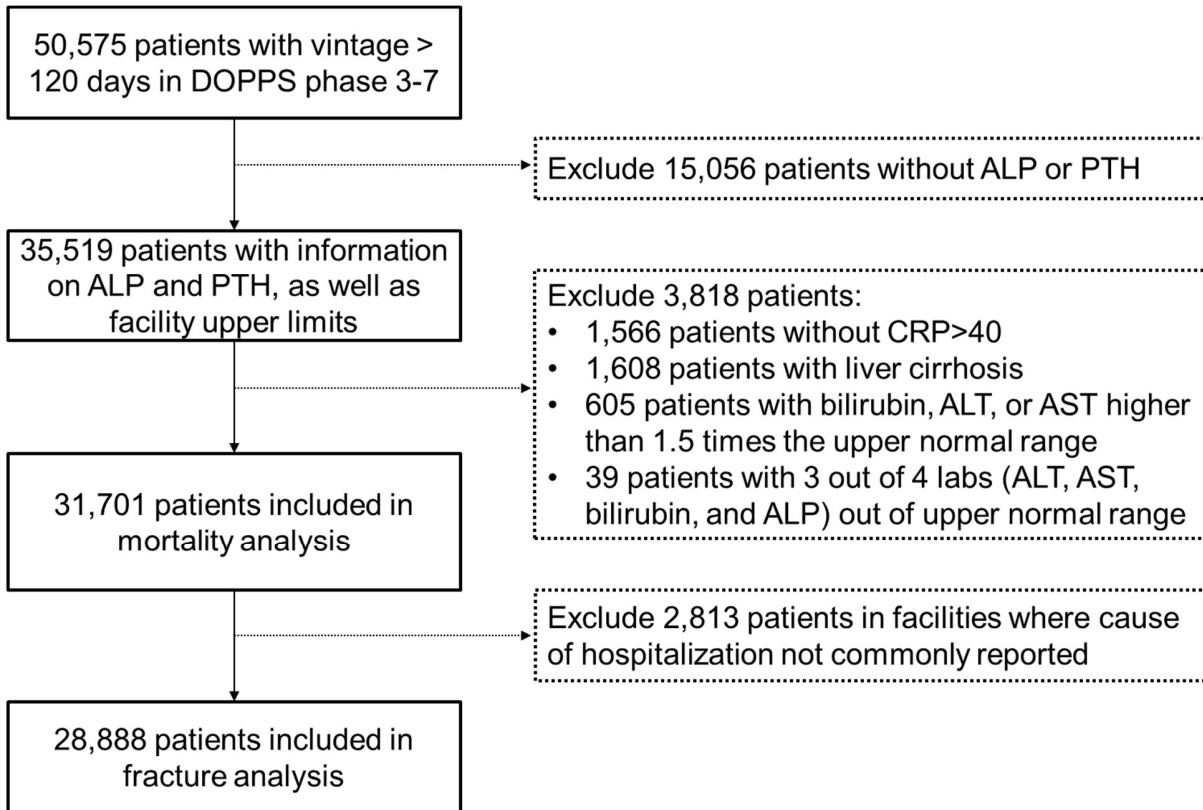

## Supplementary Figure S2

Distribution of raw (not normalized) values of (A) ALP, and (B) PTH, by region and race. ALP = alkaline phosphatase; PTH = parathyroid hormone.

### A

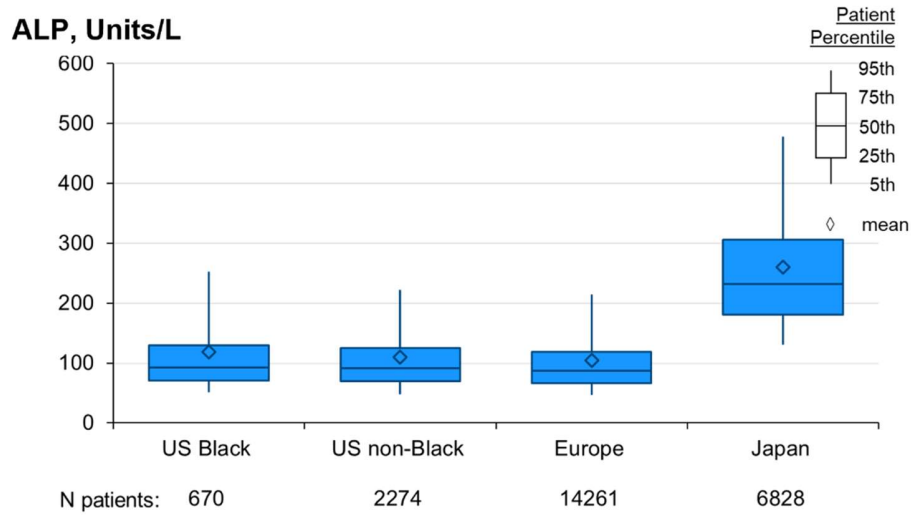

### B

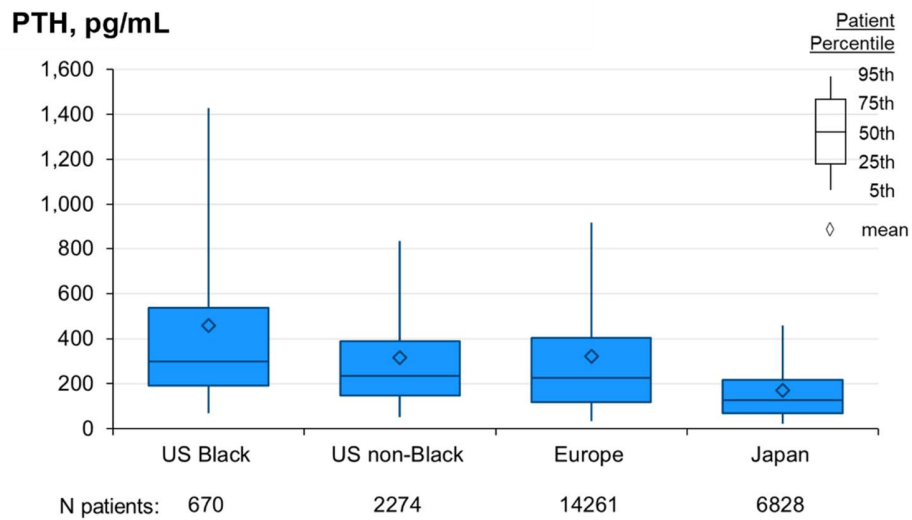

### Supplementary Figure S3

Distribution of facility upper normal limit of (A) ALP, and (B) PTH by region. ALP = alkaline phosphatase; PTH = parathyroid hormone.

**A**

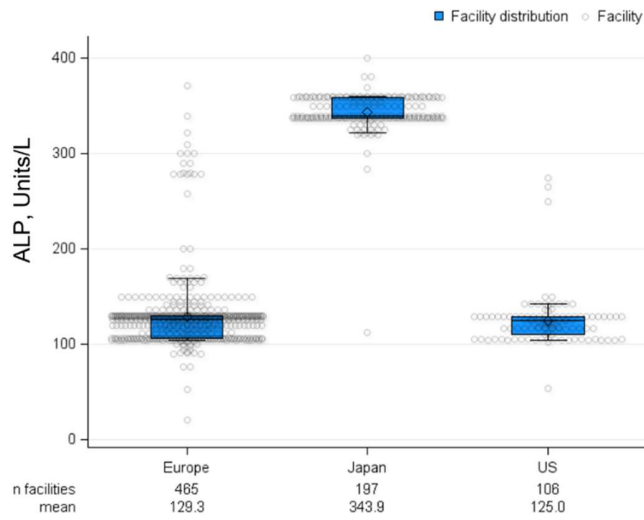

**B**

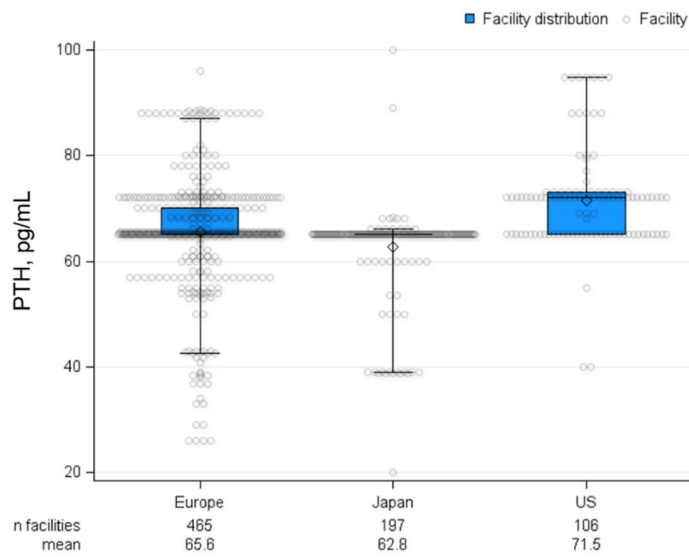

### Supplementary Figure S4

Distribution of normalized ALP, by normalized PTH. ALP = alkaline phosphatase; PTH = parathyroid hormone

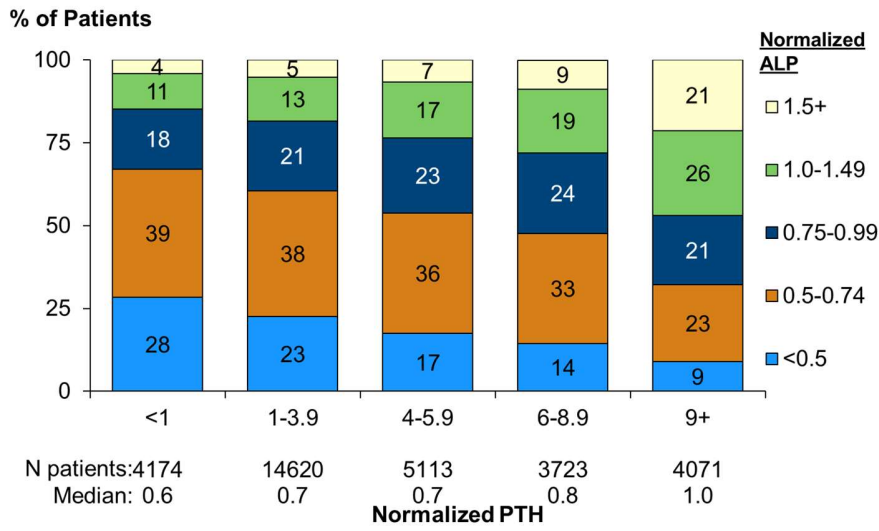

### Supplementary Figure S5

Normalized ALP by categories of normalized PTH by (A) primary cause of ESRD, (B) ADPKD, (C) diabetes, (D) CRP, (E) serum calcium, (F) serum phosphorus, (G) cinacalcet, and (H) active vitamin D. ALP = alkaline phosphatase; ADPKD = adult polycystic kidney disease; CRP = C-reactive protein; ESRD = end-stage renal disease; PTH = parathyroid hormone.

**A**

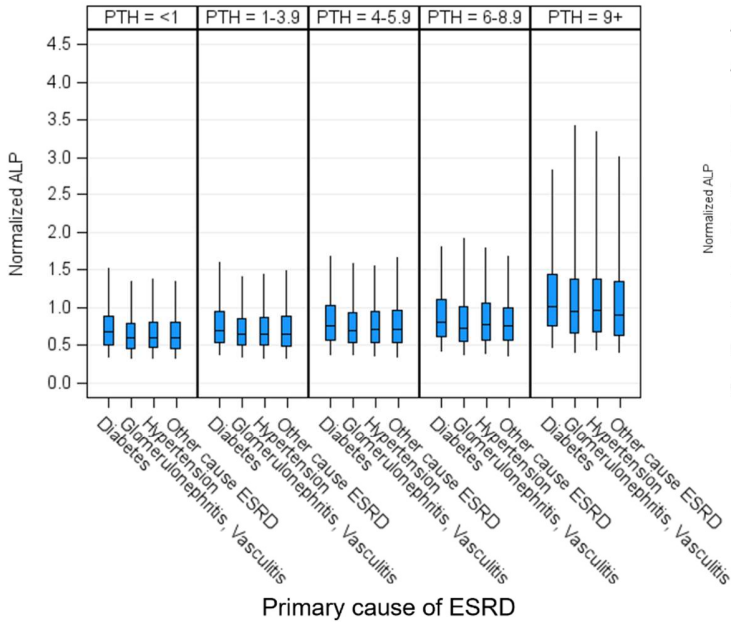

**B**

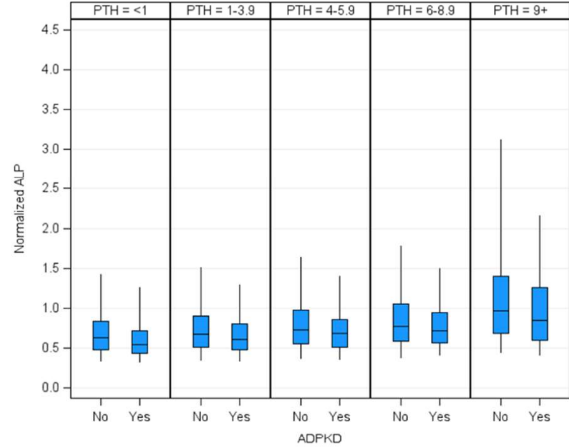

**C**

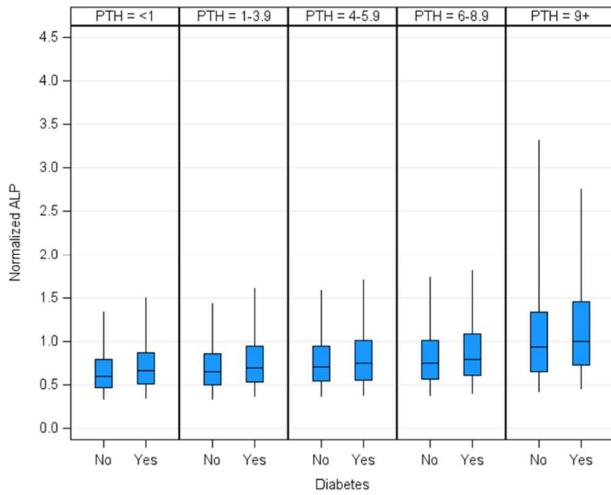

**D**

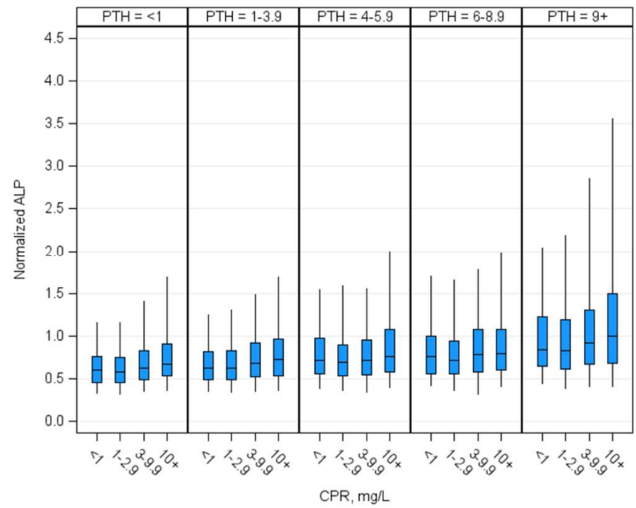

Supplementary Figure S5 (continued)

**E**

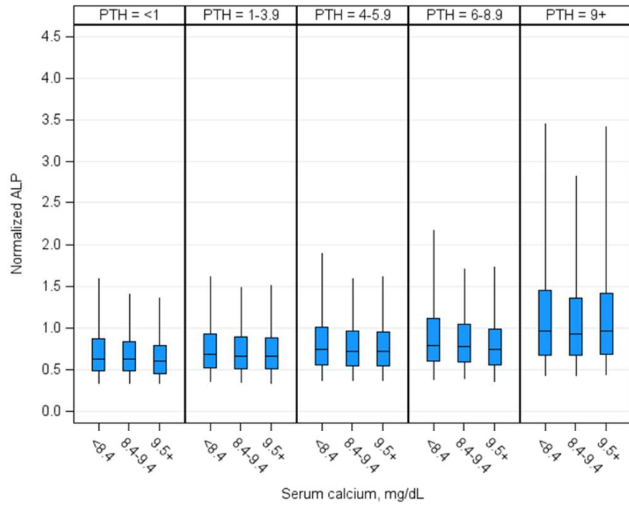

**F**

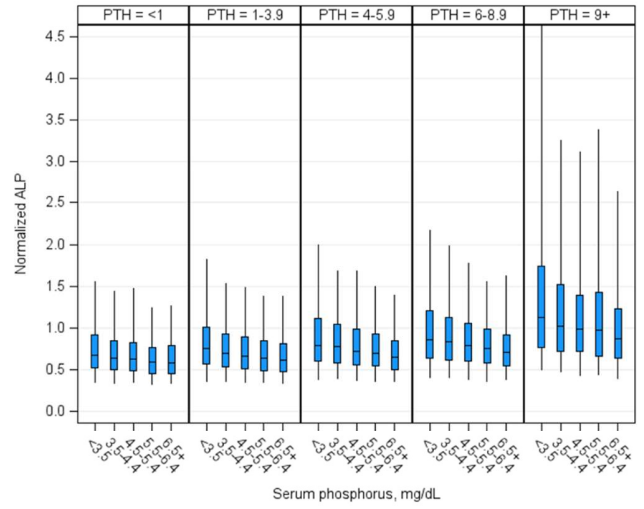

**G**

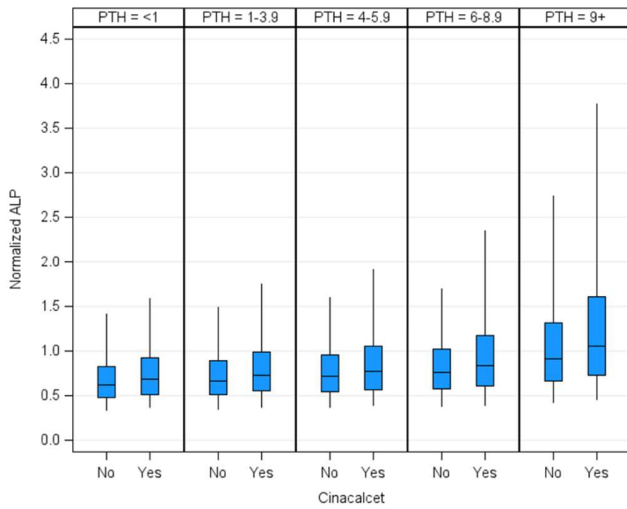

**H**

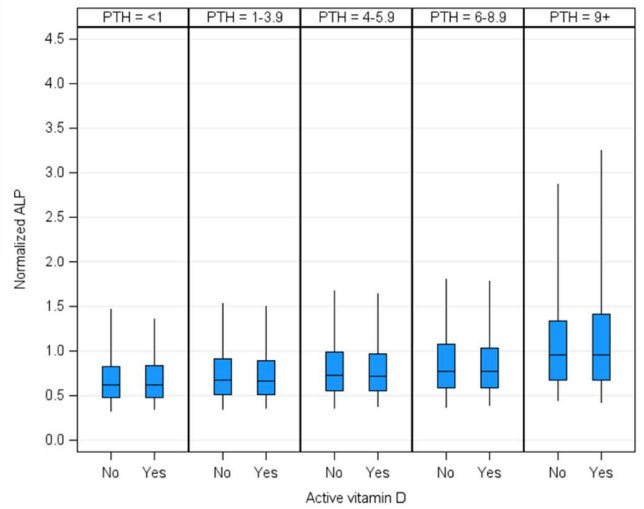

## Supplementary Table S1

Patient characteristics, by (A) normalized ALP and (B) normalized PTH, within each region and race

### A

| Characteristics                 | Europe           |                  |                  |                  |                  | Japan            |                  |                   |                   |                   | US Black         |                  |                  |                  |                  | US non-Black     |                  |                  |                  |                  |
|---------------------------------|------------------|------------------|------------------|------------------|------------------|------------------|------------------|-------------------|-------------------|-------------------|------------------|------------------|------------------|------------------|------------------|------------------|------------------|------------------|------------------|------------------|
|                                 | <0.5             | 0.5-0.74         | 0.75-0.99        | 1.0-1.49         | 1.5+             | <0.5             | 0.5-0.74         | 0.75-0.99         | 1.0-1.49          | 1.5+              | <0.5             | 0.5-0.74         | 0.75-0.99        | 1.0-1.49         | 1.5+             | <0.5             | 0.5-0.74         | 0.75-0.99        | 1.0-1.49         | 1.5+             |
|                                 | (n = 3086)       | (n = 4966)       | (n = 2977)       | (n = 2164)       | (n = 1068)       | (n = 1376)       | (n = 2758)       | (n = 1528)        | (n = 897)         | (n = 269)         | (n = 115)        | (n = 226)        | (n = 151)        | (n = 112)        | (n = 66)         | (n = 337)        | (n = 797)        | (n = 505)        | (n = 424)        | (n = 211)        |
| <b>Demographics</b>             |                  |                  |                  |                  |                  |                  |                  |                   |                   |                   |                  |                  |                  |                  |                  |                  |                  |                  |                  |                  |
| Age, y                          | 65 ± 15          | 67 ± 15          | 67 ± 15          | 66 ± 15          | 64 ± 16          | 63 ± 12          | 65 ± 12          | 66 ± 12           | 67 ± 12           | 66 ± 11           | 57 ± 14          | 59 ± 14          | 63 ± 14          | 63 ± 13          | 52 ± 14          | 64 ± 16          | 66 ± 15          | 65 ± 15          | 65 ± 14          | 62 ± 15          |
| Sex (% male)                    | 68%              | 64%              | 58%              | 55%              | 51%              | 72%              | 68%              | 63%               | 52%               | 45%               | 58%              | 53%              | 52%              | 44%              | 48%              | 62%              | 57%              | 52%              | 53%              | 43%              |
| Race (% Black)                  | 2%               | 2%               | 3%               | 3%               | 4%               | 0%               | 0%               | 0.10%             | 0%                | 0%                | 100%             | 100%             | 100%             | 100%             | 100%             | 0%               | 0%               | 0%               | 0%               | 0%               |
| Vintage, y                      | 1.7<br>[0.7,4.5] | 2.0<br>[0.8,5.0] | 2.4<br>[0.9,5.7] | 3.1<br>[1.1,6.9] | 3.9<br>[1.4,8.0] | 3.4<br>[1.1,7.9] | 4.1<br>[1.1,9.2] | 5.1<br>[1.4,11.0] | 5.7<br>[1.6,12.6] | 6.9<br>[2.3,13.2] | 2.5<br>[0.9,5.0] | 2.2<br>[0.9,5.1] | 3.3<br>[1.2,6.4] | 2.8<br>[1.2,6.3] | 4.0<br>[2.1,8.0] | 1.5<br>[0.6,3.6] | 1.5<br>[0.6,3.4] | 1.6<br>[0.8,3.6] | 2.2<br>[0.9,4.8] | 2.9<br>[1.0,5.2] |
| <b>Comorbidity history</b>      |                  |                  |                  |                  |                  |                  |                  |                   |                   |                   |                  |                  |                  |                  |                  |                  |                  |                  |                  |                  |
| Diabetes                        | 32%              | 36%              | 39%              | 41%              | 43%              | 42%              | 42%              | 43%               | 39%               | 42%               | 52%              | 53%              | 63%              | 63%              | 55%              | 54%              | 58%              | 64%              | 66%              | 64%              |
| Hypertension                    | 87%              | 88%              | 87%              | 85%              | 85%              | 82%              | 82%              | 80%               | 80%               | 78%               | 94%              | 93%              | 94%              | 98%              | 88%              | 95%              | 91%              | 91%              | 91%              | 86%              |
| Coronary artery disease         | 36%              | 37%              | 37%              | 39%              | 41%              | 25%              | 31%              | 32%               | 34%               | 32%               | 55%              | 48%              | 46%              | 48%              | 41%              | 50%              | 56%              | 55%              | 62%              | 56%              |
| Heart failure                   | 23%              | 24%              | 26%              | 25%              | 25%              | 16%              | 19%              | 20%               | 23%               | 25%               | 42%              | 37%              | 38%              | 40%              | 34%              | 37%              | 37%              | 41%              | 45%              | 48%              |
| Cerebrovascular disease         | 15%              | 16%              | 16%              | 17%              | 15%              | 13%              | 15%              | 17%               | 17%               | 18%               | 16%              | 15%              | 13%              | 19%              | 13%              | 19%              | 17%              | 17%              | 18%              | 20%              |
| Peripheral vascular disease     | 24%              | 29%              | 30%              | 32%              | 33%              | 13%              | 15%              | 18%               | 20%               | 20%               | 18%              | 27%              | 27%              | 30%              | 23%              | 32%              | 31%              | 34%              | 39%              | 42%              |
| Other cardiovascular diseases   | 32%              | 33%              | 35%              | 37%              | 37%              | 21%              | 26%              | 27%               | 32%               | 32%               | 28%              | 19%              | 24%              | 31%              | 22%              | 32%              | 31%              | 30%              | 37%              | 36%              |
| Gastrointestinal bleeding       | 3%               | 4%               | 5%               | 5%               | 6%               | 2%               | 4%               | 4%                | 5%                | 6%                | 4%               | 5%               | 6%               | 4%               | 3%               | 5%               | 6%               | 5%               | 8%               | 8%               |
| Lung disease                    | 13%              | 14%              | 14%              | 15%              | 12%              | 3%               | 4%               | 4%                | 4%                | 6%                | 10%              | 12%              | 17%              | 12%              | 6%               | 19%              | 21%              | 19%              | 24%              | 26%              |
| Neurologic disease              | 11%              | 12%              | 13%              | 13%              | 11%              | 5%               | 7%               | 9%                | 8%                | 12%               | 10%              | 14%              | 12%              | 13%              | 20%              | 10%              | 11%              | 12%              | 10%              | 18%              |
| Psychiatric disorder            | 14%              | 15%              | 17%              | 15%              | 16%              | 2%               | 4%               | 4%                | 4%                | 4%                | 23%              | 23%              | 15%              | 21%              | 30%              | 26%              | 24%              | 26%              | 30%              | 36%              |
| Cancer                          | 18%              | 18%              | 16%              | 17%              | 16%              | 11%              | 11%              | 11%               | 12%               | 15%               | 7%               | 10%              | 9%               | 8%               | 11%              | 15%              | 16%              | 14%              | 14%              | 14%              |
| Recurrent cellulitis / gangrene | 6%               | 8%               | 11%              | 12%              | 14%              | 3%               | 3%               | 4%                | 5%                | 8%                | 6%               | 7%               | 9%               | 10%              | 13%              | 12%              | 9%               | 10%              | 19%              | 21%              |
| HIV                             | 0.50%            | 0.70%            | 0.40%            | 0.70%            | 0.90%            | 0.60%            | 0.60%            | 0.40%             | 0.90%             | 0%                | 9%               | 6%               | 3%               | 5%               | 10%              | 1%               | 0.40%            | 0%               | 2%               | 0%               |
| ADPKD                           | 7%               | 7%               | 5%               | 5%               | 4%               | 5%               | 4%               | 5%                | 3%                | 2%                | 1%               | 1%               | 0.70%            | 0%               | 0%               | 7%               | 4%               | 3%               | 2%               | 3%               |
| <b>Dialysis treatments</b>      |                  |                  |                  |                  |                  |                  |                  |                   |                   |                   |                  |                  |                  |                  |                  |                  |                  |                  |                  |                  |
| Vascular access type            |                  |                  |                  |                  |                  |                  |                  |                   |                   |                   |                  |                  |                  |                  |                  |                  |                  |                  |                  |                  |
| Catheter                        | 24%              | 27%              | 27%              | 29%              | 30%              | 0.80%            | 1%               | 1%                | 1%                | 3%                | 24%              | 28%              | 29%              | 22%              | 35%              | 34%              | 34%              | 35%              | 32%              | 33%              |
| Fistula                         | 69%              | 67%              | 67%              | 65%              | 63%              | 94%              | 93%              | 92%               | 90%               | 90%               | 59%              | 40%              | 34%              | 42%              | 41%              | 52%              | 52%              | 54%              | 52%              | 51%              |
| Graft                           | 6%               | 6%               | 6%               | 6%               | 7%               | 5%               | 6%               | 7%                | 9%                | 7%                | 17%              | 31%              | 36%              | 36%              | 24%              | 14%              | 14%              | 12%              | 16%              | 16%              |
| Single pool Kt/V                | 1.5 ± 0.3        | 1.5 ± 0.3        | 1.5 ± 0.3        | 1.6 ± 0.3        | 1.6 ± 0.3        | 1.4 ± 0.3        | 1.4 ± 0.3        | 1.4 ± 0.3         | 1.5 ± 0.3         | 1.5 ± 0.3         | 1.5 ± 0.2        | 1.5 ± 0.3        | 1.5 ± 0.3        | 1.5 ± 0.3        | 1.5 ± 0.3        | 1.6 ± 0.3        | 1.6 ± 0.3        | 1.6 ± 0.3        | 1.6 ± 0.3        | 1.6 ± 0.3        |



| <b>Lab/biometric markers</b>       |               |                |                |                |                |               |               |               |               |               |            |            |            |            |            |            |            |            |            |            |            |
|------------------------------------|---------------|----------------|----------------|----------------|----------------|---------------|---------------|---------------|---------------|---------------|------------|------------|------------|------------|------------|------------|------------|------------|------------|------------|------------|
| Body mass index, kg/m <sup>2</sup> | 26.4 ± 5.3    | 26.3 ± 5.4     | 26.0 ± 5.5     | 25.9 ± 5.7     | 25.5 ± 5.7     | 22.2 ± 3.7    | 21.8 ± 3.7    | 21.4 ± 3.6    | 21.0 ± 3.5    | 20.8 ± 3.8    | 28.3 ± 6.6 | 28.8 ± 7.4 | 28.4 ± 6.6 | 29.5 ± 7.3 | 27.7 ± 7.6 | 27.9 ± 6.6 | 28.8 ± 7.0 | 28.6 ± 6.8 | 28.3 ± 7.4 | 28.3 ± 8.2 |            |
| <18                                | 3%            | 3%             | 4%             | 4%             | 5%             | 10%           | 13%           | 15%           | 19%           | 24%           | 3%         | 2%         | 2%         | 0%         | 7%         | 3%         | 2%         | 2%         | 3%         | 3%         |            |
| 18-24                              | 42%           | 43%            | 44%            | 45%            | 49%            | 72%           | 71%           | 72%           | 70%           | 64%           | 34%        | 32%        | 32%        | 34%        | 35%        | 33%        | 30%        | 33%        | 39%        | 41%        |            |
| 25-29                              | 34%           | 33%            | 32%            | 30%            | 28%            | 15%           | 13%           | 10%           | 9%            | 10%           | 21%        | 31%        | 29%        | 22%        | 20%        | 26%        | 32%        | 30%        | 21%        | 24%        |            |
| 30+                                | 21%           | 21%            | 20%            | 21%            | 18%            | 4%            | 3%            | 3%            | 2%            | 2%            | 42%        | 36%        | 37%        | 44%        | 38%        | 37%        | 37%        | 36%        | 37%        | 32%        |            |
| Serum albumin, g/dL                | 3.8 ± 0.5     | 3.8 ± 0.5      | 3.7 ± 0.5      | 3.7 ± 0.5      | 3.7 ± 0.5      | 3.8 ± 0.4     | 3.7 ± 0.4     | 3.7 ± 0.4     | 3.6 ± 0.4     | 3.6 ± 0.4     | 3.9 ± 0.4  | 3.9 ± 0.4  | 3.7 ± 0.5  | 3.8 ± 0.5  | 3.8 ± 0.4  | 3.8 ± 0.4  | 3.7 ± 0.4  | 3.7 ± 0.4  | 3.6 ± 0.4  | 3.6 ± 0.5  |            |
| Hemoglobin, g/dL                   | 11.5 ± 1.4    | 11.5 ± 1.4     | 11.5 ± 1.4     | 11.6 ± 1.4     | 11.5 ± 1.5     | 10.8 ± 1.2    | 10.7 ± 1.2    | 10.7 ± 1.3    | 10.7 ± 1.3    | 10.4 ± 1.4    | 11.5 ± 1.3 | 11.5 ± 1.3 | 11.6 ± 1.4 | 11.4 ± 1.3 | 11.4 ± 1.3 | 11.3 ± 1.3 | 11.3 ± 1.3 | 11.5 ± 1.3 | 11.6 ± 1.3 | 11.4 ± 1.3 | 11.3 ± 1.4 |
| Serum phosphorus, mg/dL            | 5.1 ± 1.6     | 5.0 ± 1.6      | 4.9 ± 1.6      | 4.8 ± 1.5      | 4.7 ± 1.6      | 5.6 ± 1.4     | 5.4 ± 1.4     | 5.3 ± 1.4     | 5.2 ± 1.4     | 5.1 ± 1.4     | 6.0 ± 1.8  | 5.3 ± 1.7  | 5.3 ± 1.7  | 5.3 ± 1.6  | 5.7 ± 1.7  | 5.6 ± 1.7  | 5.4 ± 1.7  | 5.3 ± 1.7  | 5.4 ± 1.7  | 5.3 ± 1.7  | 5.3 ± 1.7  |
| <3.5                               | 12%           | 14%            | 16%            | 19%            | 21%            | 4%            | 6%            | 7%            | 8%            | 12%           | 3%         | 13%        | 10%        | 9%         | 8%         | 7%         | 10%        | 10%        | 9%         | 11%        |            |
| 3.5-4.4                            | 24%           | 26%            | 27%            | 26%            | 27%            | 16%           | 19%           | 19%           | 21%           | 19%           | 17%        | 18%        | 24%        | 24%        | 18%        | 18%        | 22%        | 23%        | 23%        | 24%        |            |
| 4.5-5.4                            | 27%           | 26%            | 26%            | 26%            | 26%            | 28%           | 30%           | 30%           | 32%           | 33%           | 22%        | 27%        | 26%        | 30%        | 15%        | 27%        | 27%        | 29%        | 26%        | 27%        |            |
| 5.5-6.4                            | 18%           | 18%            | 16%            | 16%            | 13%            | 28%           | 25%           | 26%           | 24%           | 20%           | 27%        | 19%        | 17%        | 16%        | 25%        | 24%        | 19%        | 18%        | 17%        | 16%        |            |
| 6.5+                               | 18%           | 16%            | 15%            | 13%            | 13%            | 24%           | 20%           | 18%           | 15%           | 16%           | 31%        | 22%        | 24%        | 21%        | 34%        | 24%        | 22%        | 20%        | 25%        | 22%        |            |
| Serum calcium, mg/dL               | 9.0 ± 0.8     | 9.0 ± 0.7      | 9.0 ± 0.7      | 9.0 ± 0.7      | 8.9 ± 0.8      | 9.0 ± 0.8     | 8.8 ± 0.8     | 8.8 ± 0.8     | 8.7 ± 0.7     | 8.8 ± 0.9     | 9.2 ± 0.7  | 9.1 ± 0.7  | 9.1 ± 0.8  | 8.9 ± 0.7  | 8.8 ± 0.7  | 9.0 ± 0.8  | 9.0 ± 0.7  | 8.9 ± 0.7  | 8.9 ± 0.7  | 8.7 ± 0.8  |            |
| <8.4                               | 17%           | 18%            | 17%            | 18%            | 24%            | 20%           | 25%           | 26%           | 30%           | 33%           | 9%         | 14%        | 16%        | 22%        | 27%        | 20%        | 16%        | 17%        | 20%        | 31%        |            |
| 8.4-9.4                            | 59%           | 59%            | 60%            | 59%            | 55%            | 58%           | 57%           | 56%           | 55%           | 47%           | 58%        | 56%        | 54%        | 56%        | 55%        | 55%        | 62%        | 64%        | 62%        | 49%        |            |
| 9.5+                               | 24%           | 23%            | 24%            | 23%            | 21%            | 23%           | 18%           | 18%           | 15%           | 21%           | 33%        | 31%        | 30%        | 21%        | 18%        | 25%        | 22%        | 19%        | 18%        | 20%        |            |
| CRP, mg/L                          | 4.5 [2.0,9.0] | 5.0 [2.6,11.0] | 5.6 [3.0,12.0] | 6.0 [3.0,13.0] | 7.0 [4.0,15.7] | 1.0 [0.5,2.0] | 1.0 [0.5,3.1] | 1.3 [0.7,3.6] | 1.4 [0.7,4.5] | 2.2 [0.5,6.7] | -          | -          | -          | -          | -          | -          | -          | -          | -          | -          |            |
| <1                                 | 7%            | 6%             | 5%             | 5%             | 3%             | 42%           | 36%           | 33%           | 32%           | 32%           | -          | -          | -          | -          | -          | -          | -          | -          | -          | -          |            |
| 1-2.9                              | 26%           | 22%            | 18%            | 15%            | 14%            | 39%           | 35%           | 35%           | 32%           | 22%           | -          | -          | -          | -          | -          | -          | -          | -          | -          | -          |            |
| 3-9.9                              | 44%           | 45%            | 47%            | 46%            | 44%            | 15%           | 20%           | 22%           | 24%           | 30%           | -          | -          | -          | -          | -          | -          | -          | -          | -          | -          |            |
| 10+                                | 23%           | 28%            | 30%            | 34%            | 39%            | 4%            | 9%            | 10%           | 12%           | 16%           | -          | -          | -          | -          | -          | -          | -          | -          | -          | -          |            |
| <b>Medication</b>                  |               |                |                |                |                |               |               |               |               |               |            |            |            |            |            |            |            |            |            |            |            |
| Calcium-based phosphate binder     | 48%           | 43%            | 40%            | 38%            | 36%            | 67%           | 60%           | 55%           | 52%           | 45%           | 58%        | 42%        | 45%        | 32%        | 52%        | 54%        | 49%        | 48%        | 46%        | 35%        |            |
| Non-calcium-based phosphate binder | 50%           | 54%            | 54%            | 55%            | 54%            | 57%           | 51%           | 51%           | 50%           | 48%           | 46%        | 52%        | 56%        | 48%        | 57%        | 41%        | 44%        | 44%        | 51%        | 56%        |            |
| Cinacalcet                         | 10%           | 13%            | 17%            | 20%            | 29%            | 13%           | 16%           | 16%           | 18%           | 22%           | 19%        | 21%        | 30%        | 27%        | 46%        | 10%        | 12%        | 14%        | 18%        | 29%        |            |
| Vitamin D                          | 53%           | 54%            | 54%            | 55%            | 57%            | 72%           | 71%           | 70%           | 68%           | 65%           | 91%        | 81%        | 85%        | 82%        | 81%        | 61%        | 65%        | 66%        | 64%        | 68%        |            |

Mean ± standard deviation, median [IQR], or prevalence (%) shown.

\*CRP was restricted to facilities routinely measuring CRP, US and Russia were excluded because CRP not commonly measured. ADPKD = adult polycystic kidney disease; ALP = alkaline phosphatase; HIV = human immunodeficiency virus; PTH = parathyroid hormone.

**B**

| Characteristics                    | Europe           |                  |                  |                  |                  | Japan             |                  |                   |                   |                   | US Black         |                  |                  |                  |                  | US non-Black     |                  |                  |                  |                  |
|------------------------------------|------------------|------------------|------------------|------------------|------------------|-------------------|------------------|-------------------|-------------------|-------------------|------------------|------------------|------------------|------------------|------------------|------------------|------------------|------------------|------------------|------------------|
|                                    | <1               | 1-3.9            | 4-5.9            | 6-8.9            | 9+               | <1                | 1-3.9            | 4-5.9             | 6-8.9             | 9+                | <1               | 1-3.9            | 4-5.9            | 6-8.9            | 9+               | <1               | 1-3.9            | 4-5.9            | 6-8.9            | 9+               |
|                                    | (n = 1685)       | (n = 6372)       | (n = 2484)       | (n = 1816)       | (n = 1904)       | (n = 1482)        | (n = 4022)       | (n = 762)         | (n = 370)         | (n = 192)         | (n = 38)         | (n = 271)        | (n = 138)        | (n = 87)         | (n = 136)        | (n = 188)        | (n = 1182)       | (n = 419)        | (n = 259)        | (n = 226)        |
| <b>Demographics</b>                |                  |                  |                  |                  |                  |                   |                  |                   |                   |                   |                  |                  |                  |                  |                  |                  |                  |                  |                  |                  |
| Age, y                             | 66 ± 15          | 68 ± 14          | 66 ± 15          | 65 ± 15          | 61 ± 16          | 66 ± 12           | 65 ± 12          | 64 ± 12           | 61 ± 12           | 59 ± 12           | 57 ± 15          | 61 ± 14          | 63 ± 14          | 58 ± 15          | 55 ± 13          | 63 ± 15          | 67 ± 14          | 64 ± 15          | 64 ± 15          | 56 ± 17          |
| Sex (% male)                       | 57%              | 62%              | 65%              | 62%              | 57%              | 63%               | 66%              | 62%               | 61%               | 54%               | 53%              | 52%              | 47%              | 46%              | 58%              | 51%              | 55%              | 59%              | 50%              | 54%              |
| Race (% Black)                     | 2%               | 2%               | 3%               | 3%               | 5%               | 0%                | 0%               | 0.00%             | 0%                | 0%                | 100%             | 100%             | 100%             | 100%             | 100%             | 0%               | 0%               | 0%               | 0%               | 0%               |
| Vintage, y                         | 1.9<br>[0.7,5.6] | 2.0<br>[0.8,4.8] | 2.2<br>[0.8,5.3] | 2.8<br>[1.0,6.3] | 3.6<br>[1.2,7.5] | 4.2<br>[1.4,10.4] | 4.1<br>[1.1,9.3] | 4.6<br>[1.1,10.4] | 6.5<br>[1.2,12.0] | 8.4<br>[3.2,13.3] | 4.2<br>[1.3,7.9] | 2.2<br>[0.9,5.0] | 2.9<br>[1.0,5.9] | 2.7<br>[1.0,4.9] | 3.7<br>[1.8,6.6] | 1.3<br>[0.6,3.8] | 1.6<br>[0.6,3.5] | 1.8<br>[0.8,4.1] | 2.3<br>[0.9,4.6] | 2.8<br>[1.1,5.2] |
| <b>Comorbidity history</b>         |                  |                  |                  |                  |                  |                   |                  |                   |                   |                   |                  |                  |                  |                  |                  |                  |                  |                  |                  |                  |
| Diabetes                           | 35%              | 39%              | 39%              | 34%              | 30%              | 44%               | 43%              | 40%               | 33%               | 24%               | 49%              | 59%              | 59%              | 57%              | 53%              | 56%              | 63%              | 63%              | 63%              | 48%              |
| Hypertension                       | 84%              | 87%              | 88%              | 87%              | 86%              | 81%               | 83%              | 79%               | 74%               | 76%               | 86%              | 95%              | 96%              | 94%              | 92%              | 91%              | 91%              | 91%              | 92%              | 88%              |
| Coronary artery disease            | 40%              | 38%              | 38%              | 35%              | 35%              | 31%               | 31%              | 31%               | 29%               | 34%               | 46%              | 52%              | 42%              | 46%              | 49%              | 52%              | 60%              | 58%              | 53%              | 41%              |
| Heart failure                      | 27%              | 25%              | 23%              | 19%              | 23%              | 22%               | 19%              | 19%               | 15%               | 19%               | 26%              | 39%              | 45%              | 40%              | 32%              | 37%              | 42%              | 41%              | 42%              | 33%              |
| Cerebrovascular disease            | 17%              | 17%              | 16%              | 15%              | 15%              | 15%               | 17%              | 13%               | 12%               | 13%               | 19%              | 18%              | 12%              | 18%              | 10%              | 19%              | 20%              | 16%              | 15%              | 9%               |
| Peripheral vascular disease        | 29%              | 30%              | 30%              | 27%              | 27%              | 16%               | 16%              | 17%               | 14%               | 8%                | 19%              | 30%              | 25%              | 22%              | 21%              | 34%              | 37%              | 34%              | 33%              | 25%              |
| Other cardiovascular disease       | 36%              | 36%              | 32%              | 30%              | 32%              | 27%               | 26%              | 26%               | 23%               | 26%               | 11%              | 26%              | 26%              | 26%              | 20%              | 34%              | 35%              | 32%              | 32%              | 23%              |
| Gastrointestinal bleeding          | 4%               | 5%               | 4%               | 4%               | 4%               | 4%                | 4%               | 4%                | 5%                | 2%                | 6%               | 6%               | 4%               | 5%               | 4%               | 4%               | 7%               | 7%               | 4%               | 3%               |
| Lung disease                       | 12%              | 15%              | 13%              | 14%              | 12%              | 4%                | 3%               | 4%                | 4%                | 4%                | 16%              | 13%              | 12%              | 13%              | 11%              | 23%              | 22%              | 20%              | 21%              | 15%              |
| Neurologic disease                 | 15%              | 12%              | 11%              | 12%              | 10%              | 9%                | 8%               | 7%                | 5%                | 3%                | 8%               | 18%              | 7%               | 13%              | 10%              | 18%              | 12%              | 10%              | 9%               | 10%              |
| Psychiatric disorder               | 16%              | 16%              | 14%              | 12%              | 17%              | 4%                | 3%               | 4%                | 4%                | 3%                | 22%              | 25%              | 15%              | 17%              | 23%              | 34%              | 25%              | 25%              | 30%              | 26%              |
| Cancer                             | 19%              | 17%              | 16%              | 16%              | 15%              | 13%               | 11%              | 12%               | 9%                | 7%                | 11%              | 9%               | 9%               | 9%               | 7%               | 13%              | 16%              | 15%              | 13%              | 11%              |
| Recurrent cellulitis / gangrene    | 10%              | 10%              | 9%               | 9%               | 8%               | 4%                | 4%               | 4%                | 3%                | 2%                | 11%              | 9%               | 7%               | 5%               | 10%              | 11%              | 13%              | 15%              | 12%              | 8%               |
| HIV                                | 0.50%            | 0.50%            | 0.60%            | 0.60%            | 0.90%            | 0.80%             | 0.50%            | 0.30%             | 0.70%             | 0%                | 5%               | 6%               | 7%               | 4%               | 8%               | 2%               | 0.80%            | 0%               | 0%               | 1%               |
| ADPKD                              | 6%               | 6%               | 7%               | 7%               | 6%               | 3%                | 4%               | 5%                | 4%                | 9%                | 0%               | 0%               | 0.80%            | 0%               | 2%               | 6%               | 3%               | 5%               | 4%               | 3%               |
| <b>Dialysis treatments</b>         |                  |                  |                  |                  |                  |                   |                  |                   |                   |                   |                  |                  |                  |                  |                  |                  |                  |                  |                  |                  |
| Vascular access type               |                  |                  |                  |                  |                  |                   |                  |                   |                   |                   |                  |                  |                  |                  |                  |                  |                  |                  |                  |                  |
| Catheter                           | 30%              | 27%              | 25%              | 24%              | 27%              | 2.00%             | 1%               | 0%                | 2%                | 41%               | 23%              | 26%              | 36%              | 27%              | 41%              | 35%              | 31%              | 29%              | 34%              |                  |
| Fistula                            | 65%              | 67%              | 69%              | 69%              | 66%              | 91%               | 93%              | 93%               | 93%               | 95%               | 30%              | 44%              | 45%              | 40%              | 44%              | 38%              | 51%              | 56%              | 57%              | 54%              |
| Graft                              | 6%               | 6%               | 6%               | 7%               | 6%               | 8%                | 6%               | 6%                | 7%                | 3%                | 30%              | 33%              | 30%              | 24%              | 29%              | 20%              | 14%              | 13%              | 14%              | 12%              |
| Single pool Kt/V                   | 1.5 ± 0.3        | 1.5 ± 0.3        | 1.5 ± 0.3        | 1.5 ± 0.3        | 1.5 ± 0.3        | 1.4 ± 0.3         | 1.4 ± 0.3        | 1.4 ± 0.3         | 1.4 ± 0.3         | 1.4 ± 0.3         | 1.5 ± 0.3        | 1.6 ± 0.2        | 1.5 ± 0.3        | 1.5 ± 0.3        | 1.5 ± 0.3        | 1.6 ± 0.3        | 1.6 ± 0.3        | 1.6 ± 0.3        | 1.6 ± 0.3        | 1.5 ± 0.3        |
| <b>Lab/biometric markers</b>       |                  |                  |                  |                  |                  |                   |                  |                   |                   |                   |                  |                  |                  |                  |                  |                  |                  |                  |                  |                  |
| Body mass index, kg/m <sup>2</sup> | 25.2 ± 5.5       | 25.9 ± 5.2       | 26.7 ± 5.6       | 26.6 ± 5.7       | 26.3 ± 5.8       | 21.2 ± 3.5        | 21.7 ± 3.6       | 21.9 ± 3.6        | 22.2 ± 4.0        | 22.2 ± 4.3        | 28.5 ± 8.6       | 28.3 ± 6.9       | 28.8 ± 6.6       | 29.4 ± 7.6       | 28.9 ± 7.3       | 27.6 ± 7.5       | 28.3 ± 7.0       | 28.4 ± 6.7       | 29.8 ± 7.4       | 28.7 ± 7.5       |
| <18                                | 6%               | 4%               | 3%               | 3%               | 4%               | 17%               | 14%              | 12%               | 11%               | 12%               | 6%               | 2%               | 1%               | 3%               | 2%               | 5%               | 2%               | 2%               | 0%               | 3%               |
| 18-24                              | 48%              | 45%              | 41%              | 41%              | 43%              | 71%               | 71%              | 71%               | 71%               | 68%               | 34%              | 33%              | 35%              | 29%              | 32%              | 36%              | 35%              | 32%              | 29%              | 32%              |
| 25-29                              | 28%              | 33%              | 33%              | 33%              | 32%              | 9%                | 12%              | 14%               | 14%               | 12%               | 17%              | 31%              | 20%              | 26%              | 25%              | 28%              | 27%              | 31%              | 28%              | 27%              |
| 30+                                | 18%              | 19%              | 24%              | 24%              | 22%              | 2%                | 3%               | 3%                | 4%                | 8%                | 43%              | 33%              | 45%              | 42%              | 40%              | 31%              | 36%              | 35%              | 43%              | 38%              |

|                                    |                |                |                |                |                |               |               |               |               |               |            |            |            |            |            |            |            |            |            |            |
|------------------------------------|----------------|----------------|----------------|----------------|----------------|---------------|---------------|---------------|---------------|---------------|------------|------------|------------|------------|------------|------------|------------|------------|------------|------------|
| Serum albumin, g/dL                | 3.7 ± 0.5      | 3.7 ± 0.5      | 3.8 ± 0.5      | 3.8 ± 0.5      | 3.8 ± 0.5      | 3.7 ± 0.4     | 3.7 ± 0.4     | 3.7 ± 0.4     | 3.8 ± 0.3     | 3.8 ± 0.4     | 3.7 ± 0.5  | 3.8 ± 0.5  | 3.9 ± 0.4  | 3.8 ± 0.4  | 3.8 ± 0.4  | 3.6 ± 0.5  | 3.7 ± 0.4  | 3.7 ± 0.4  | 3.7 ± 0.4  | 3.8 ± 0.5  |
| Hemoglobin, g/dL                   | 11.4 ± 1.4     | 11.5 ± 1.4     | 11.6 ± 1.4     | 11.5 ± 1.4     | 11.5 ± 1.5     | 10.6 ± 1.3    | 10.7 ± 1.2    | 10.7 ± 1.3    | 10.7 ± 1.3    | 10.7 ± 1.3    | 11.3 ± 1.4 | 11.6 ± 1.4 | 11.5 ± 1.3 | 11.4 ± 1.4 | 11.4 ± 1.3 | 11.5 ± 1.4 | 11.5 ± 1.3 | 11.5 ± 1.3 | 11.3 ± 1.3 | 11.4 ± 1.5 |
| Serum phosphorus, mg/dL            | 4.8 ± 1.6      | 4.8 ± 1.5      | 5.0 ± 1.5      | 5.3 ± 1.5      | 5.6 ± 1.7      | 5.2 ± 1.4     | 5.3 ± 1.4     | 5.8 ± 1.5     | 5.9 ± 1.4     | 6.2 ± 1.6     | 4.8 ± 1.9  | 5.0 ± 1.4  | 5.5 ± 1.6  | 5.8 ± 1.8  | 6.3 ± 1.8  | 4.9 ± 1.7  | 5.0 ± 1.5  | 5.5 ± 1.6  | 5.9 ± 1.7  | 6.8 ± 1.9  |
| <3.5                               | 20%            | 18%            | 14%            | 10%            | 9%             | 9%            | 6%            | 3%            | 2%            | 2%            | 26%        | 11%        | 10%        | 7%         | 3%         | 18%        | 13%        | 5%         | 3%         | 1%         |
| 3.5-4.4                            | 28%            | 29%            | 26%            | 21%            | 18%            | 22%           | 20%           | 13%           | 11%           | 9%            | 24%        | 27%        | 15%        | 16%        | 13%        | 27%        | 25%        | 23%        | 13%        | 9%         |
| 4.5-5.4                            | 23%            | 26%            | 27%            | 29%            | 25%            | 30%           | 31%           | 27%           | 28%           | 23%           | 24%        | 29%        | 24%        | 26%        | 19%        | 23%        | 29%        | 29%        | 25%        | 19%        |
| 5.5-6.4                            | 16%            | 15%            | 18%            | 19%            | 20%            | 24%           | 25%           | 29%           | 31%           | 29%           | 11%        | 17%        | 31%        | 18%        | 19%        | 14%        | 18%        | 19%        | 27%        | 17%        |
| 6.5+                               | 13%            | 12%            | 15%            | 20%            | 28%            | 15%           | 18%           | 27%           | 28%           | 38%           | 16%        | 15%        | 20%        | 32%        | 47%        | 19%        | 14%        | 24%        | 31%        | 54%        |
| Serum calcium, mg/dL               | 9.1 ± 0.8      | 9.0 ± 0.7      | 8.9 ± 0.7      | 8.9 ± 0.8      | 9.0 ± 0.8      | 9.0 ± 0.8     | 8.8 ± 0.7     | 8.8 ± 0.8     | 8.9 ± 0.8     | 9.0 ± 0.9     | 9.1 ± 1.2  | 9.1 ± 0.7  | 9.1 ± 0.8  | 9.0 ± 0.8  | 9.0 ± 0.8  | 9.1 ± 0.9  | 9.0 ± 0.7  | 8.9 ± 0.7  | 8.8 ± 0.7  | 8.8 ± 0.8  |
| <8.4                               | 15%            | 16%            | 19%            | 23%            | 22%            | 19%           | 26%           | 31%           | 26%           | 23%           | 16%        | 13%        | 13%        | 15%        | 26%        | 18%        | 15%        | 20%        | 25%        | 30%        |
| 8.4-9.4                            | 52%            | 62%            | 61%            | 55%            | 53%            | 55%           | 58%           | 51%           | 54%           | 47%           | 38%        | 63%        | 57%        | 56%        | 45%        | 48%        | 65%        | 61%        | 58%        | 50%        |
| 9.5+                               | 33%            | 22%            | 21%            | 22%            | 24%            | 26%           | 16%           | 18%           | 20%           | 30%           | 46%        | 24%        | 30%        | 29%        | 29%        | 34%        | 20%        | 19%        | 17%        | 20%        |
| CRP, mg/L                          | 5.8 [3.0,12.0] | 5.2 [2.7,11.5] | 5.0 [2.7,10.9] | 5.0 [2.8,10.6] | 5.0 [3.0,10.8] | 1.2 [0.7,4.0] | 1.0 [0.5,3.0] | 1.2 [0.6,3.5] | 1.2 [0.5,3.0] | 1.1 [0.5,3.2] | -          | -          | -          | -          | -          | -          | -          | -          | -          | -          |
| <1                                 | 5%             | 6%             | 6%             | 5%             | 4%             | 33%           | 37%           | 35%           | 38%           | 39%           | -          | -          | -          | -          | -          | -          | -          | -          | -          | -          |
| 1-2.9                              | 19%            | 21%            | 21%            | 22%            | 19%            | 35%           | 36%           | 35%           | 36%           | 32%           | -          | -          | -          | -          | -          | -          | -          | -          | -          | -          |
| 3-9.9                              | 43%            | 44%            | 46%            | 45%            | 49%            | 22%           | 19%           | 20%           | 21%           | 21%           | -          | -          | -          | -          | -          | -          | -          | -          | -          | -          |
| 10+                                | 33%            | 30%            | 28%            | 28%            | 28%            | 10%           | 8%            | 10%           | 5%            | 7%            | -          | -          | -          | -          | -          | -          | -          | -          | -          | -          |
| <b>Medication</b>                  |                |                |                |                |                |               |               |               |               |               |            |            |            |            |            |            |            |            |            |            |
| Calcium-based phosphate binder     | 50%            | 44%            | 40%            | 39%            | 36%            | 68%           | 56%           | 54%           | 54%           | 55%           | 47%        | 50%        | 40%        | 35%        | 45%        | 55%        | 46%        | 50%        | 43%        | 53%        |
| Non-calcium-based phosphate binder | 42%            | 50%            | 55%            | 62%            | 64%            | 48%           | 52%           | 54%           | 57%           | 63%           | 45%        | 43%        | 54%        | 63%        | 61%        | 36%        | 41%        | 50%        | 56%        | 59%        |
| Cinacalcet                         | 5%             | 11%            | 17%            | 22%            | 34%            | 11%           | 16%           | 18%           | 21%           | 28%           | 18%        | 16%        | 22%        | 38%        | 44%        | 4%         | 10%        | 16%        | 26%        | 36%        |
| Vitamin D                          | 45%            | 49%            | 60%            | 63%            | 64%            | 67%           | 71%           | 72%           | 77%           | 76%           | 58%        | 80%        | 95%        | 91%        | 85%        | 39%        | 61%        | 76%        | 77%        | 71%        |

Mean ± standard deviation, median [IQR], or prevalence (%) shown.

\*CRP was restricted to facilities routinely measuring CRP, US and Russia were excluded because CRP not commonly measured. ADPKD = adult polycystic kidney disease; ALP = alkaline phosphatase; HIV = human immunodeficiency virus; PTH = parathyroid hormone.

## Supplementary Table S2

Adjusted associations (HR, 95% CI) between (A) normalized PTH, (B) normalized ALP, and time-to-event clinical outcomes, by level of adjustment

### A

| outcome             | Normalized PTH | model 1         | model 2         | model 3         | model 4         | model 5         |
|---------------------|----------------|-----------------|-----------------|-----------------|-----------------|-----------------|
| all-cause mortality |                |                 |                 |                 |                 |                 |
|                     | <1             | 1.20(1.08,1.34) | 1.21(1.09,1.35) | 1.19(1.07,1.32) | 1.07(0.96,1.18) | 1.08(0.97,1.19) |
|                     | 1-3.9          | 1.11(1.02,1.20) | 1.05(0.97,1.14) | 1.03(0.94,1.11) | 0.97(0.90,1.06) | 0.98(0.90,1.06) |
|                     | 4-5.9          | 1 (ref)         |
|                     | 6-8.9          | 0.95(0.85,1.06) | 1.02(0.91,1.13) | 1.02(0.91,1.13) | 1.05(0.94,1.17) | 1.05(0.94,1.17) |
|                     | 9+             | 1.00(0.91,1.11) | 1.26(1.13,1.39) | 1.26(1.13,1.40) | 1.26(1.13,1.40) | 1.25(1.13,1.39) |
| CV mortality        |                |                 |                 |                 |                 |                 |
|                     | <1             | 1.15(0.97,1.37) | 1.15(0.97,1.37) | 1.15(0.97,1.36) | 1.06(0.90,1.26) | 1.08(0.91,1.28) |
|                     | 1-3.9          | 1.06(0.92,1.21) | 1.01(0.88,1.15) | 0.98(0.86,1.12) | 0.95(0.84,1.09) | 0.96(0.84,1.09) |
|                     | 4-5.9          | 1 (ref)         |
|                     | 6-8.9          | 0.94(0.79,1.13) | 1.01(0.84,1.22) | 1.02(0.85,1.23) | 1.05(0.88,1.26) | 1.05(0.87,1.26) |
|                     | 9+             | 1.08(0.92,1.28) | 1.33(1.12,1.58) | 1.35(1.14,1.60) | 1.35(1.14,1.60) | 1.34(1.13,1.59) |
| Non-CV mortality    |                |                 |                 |                 |                 |                 |
|                     | <1             | 1.23(1.09,1.40) | 1.25(1.10,1.41) | 1.21(1.07,1.38) | 1.07(0.95,1.21) | 1.08(0.95,1.22) |
|                     | 1-3.9          | 1.14(1.04,1.25) | 1.08(0.98,1.19) | 1.05(0.95,1.16) | 0.99(0.89,1.09) | 0.99(0.89,1.09) |
|                     | 4-5.9          | 1 (ref)         |
|                     | 6-8.9          | 0.95(0.84,1.09) | 1.02(0.89,1.16) | 1.01(0.89,1.16) | 1.05(0.92,1.20) | 1.05(0.92,1.20) |
|                     | 9+             | 0.96(0.85,1.09) | 1.22(1.07,1.38) | 1.21(1.06,1.38) | 1.21(1.06,1.38) | 1.21(1.06,1.38) |
| Any fracture        |                |                 |                 |                 |                 |                 |

|              |       |                 |                 |                 |                 |                 |
|--------------|-------|-----------------|-----------------|-----------------|-----------------|-----------------|
|              | <1    | 0.88(0.69,1.13) | 0.85(0.67,1.09) | 0.83(0.65,1.06) | 0.78(0.61,1.00) | 0.78(0.61,0.99) |
|              | 1-3.9 | 1.09(0.91,1.30) | 1.02(0.85,1.23) | 1.01(0.84,1.21) | 0.98(0.81,1.17) | 0.97(0.81,1.17) |
|              | 4-5.9 | 1 (ref)         |
|              | 6-8.9 | 1.02(0.81,1.27) | 1.07(0.85,1.34) | 1.07(0.85,1.35) | 1.10(0.87,1.38) | 1.11(0.88,1.39) |
|              | 9+    | 0.88(0.69,1.12) | 1.04(0.81,1.33) | 1.05(0.82,1.35) | 1.07(0.84,1.38) | 1.08(0.85,1.39) |
| Hip fracture |       |                 |                 |                 |                 |                 |
|              | <1    | 0.60(0.38,0.95) | 0.60(0.38,0.95) | 0.58(0.37,0.92) | 0.52(0.33,0.83) | 0.52(0.32,0.82) |
|              | 1-3.9 | 1.14(0.86,1.50) | 1.07(0.81,1.41) | 1.06(0.80,1.40) | 0.99(0.75,1.31) | 0.98(0.74,1.30) |
|              | 4-5.9 | 1 (ref)         |
|              | 6-8.9 | 1.07(0.75,1.53) | 1.13(0.80,1.62) | 1.14(0.79,1.63) | 1.14(0.79,1.64) | 1.15(0.80,1.66) |
|              | 9+    | 0.82(0.56,1.20) | 1.04(0.71,1.53) | 1.05(0.71,1.54) | 1.06(0.72,1.57) | 1.07(0.72,1.58) |

*Model 1: unadjusted [stratified by DOPPS phase and country]*

*Model 2: + demographics: age, sex, Black race, dialysis vintage*

*Model 3: + 13 DOPPS 'standard' comorbid conditions*

*Model 4: + single pool Kt/V, body mass index, serum albumin, serum creatinine, hemoglobin*

*Model 5: + MBD treatments (calcium-based phosphate binder, non-calcium-based phosphate binder, active vitamin D, calcimimetics) and markers (serum phosphate, serum calcium)*

*ALP = alkaline phosphatase; CV = cardiovascular; PTH = parathyroid hormone.*

B

| outcome             | Normalized ALP | model 1         | model 2         | model 3         | model 4         | model 5         |
|---------------------|----------------|-----------------|-----------------|-----------------|-----------------|-----------------|
| all-cause mortality |                |                 |                 |                 |                 |                 |
|                     | <0.5           | 0.70(0.64,0.77) | 0.73(0.66,0.80) | 0.77(0.70,0.84) | 0.81(0.74,0.89) | 0.81(0.74,0.89) |
|                     | 0.5-0.74       | 0.87(0.81,0.93) | 0.86(0.80,0.92) | 0.88(0.82,0.94) | 0.90(0.84,0.96) | 0.90(0.84,0.96) |
|                     | 0.75-0.99      | 1 (ref)         |
|                     | 1-1.49         | 1.11(1.02,1.20) | 1.13(1.04,1.23) | 1.08(1.00,1.18) | 1.05(0.97,1.15) | 1.05(0.97,1.15) |
|                     | 1.5+           | 1.33(1.20,1.47) | 1.56(1.40,1.72) | 1.42(1.28,1.57) | 1.35(1.22,1.50) | 1.35(1.22,1.50) |
| CV mortality        |                |                 |                 |                 |                 |                 |
|                     | <0.5           | 0.76(0.66,0.89) | 0.78(0.67,0.91) | 0.82(0.70,0.96) | 0.86(0.73,1.00) | 0.86(0.74,1.00) |
|                     | 0.5-0.74       | 0.88(0.78,1.00) | 0.87(0.76,0.98) | 0.89(0.78,1.01) | 0.90(0.80,1.03) | 0.91(0.80,1.03) |
|                     | 0.75-0.99      | 1 (ref)         |
|                     | 1-1.49         | 1.09(0.94,1.26) | 1.11(0.96,1.29) | 1.05(0.91,1.21) | 1.03(0.89,1.19) | 1.03(0.89,1.19) |
|                     | 1.5+           | 1.35(1.14,1.59) | 1.56(1.33,1.84) | 1.42(1.20,1.68) | 1.38(1.17,1.63) | 1.37(1.16,1.61) |
| Non-CV mortality    |                |                 |                 |                 |                 |                 |
|                     | <0.5           | 0.67(0.60,0.75) | 0.70(0.63,0.79) | 0.74(0.66,0.83) | 0.78(0.70,0.88) | 0.78(0.70,0.88) |
|                     | 0.5-0.74       | 0.86(0.79,0.93) | 0.85(0.78,0.93) | 0.87(0.80,0.95) | 0.89(0.82,0.97) | 0.89(0.82,0.97) |
|                     | 0.75-0.99      | 1 (ref)         |
|                     | 1-1.49         | 1.11(1.01,1.23) | 1.15(1.04,1.27) | 1.10(1.00,1.22) | 1.07(0.96,1.18) | 1.07(0.96,1.18) |
|                     | 1.5+           | 1.31(1.16,1.49) | 1.55(1.37,1.76) | 1.41(1.25,1.61) | 1.34(1.18,1.53) | 1.35(1.18,1.54) |
| Any fracture        |                |                 |                 |                 |                 |                 |
|                     | <0.5           | 0.65(0.51,0.82) | 0.72(0.57,0.91) | 0.74(0.58,0.94) | 0.77(0.60,0.97) | 0.76(0.60,0.97) |
|                     | 0.5-0.74       | 0.96(0.80,1.14) | 0.99(0.83,1.18) | 0.99(0.83,1.19) | 1.00(0.84,1.20) | 1.00(0.84,1.20) |
|                     | 0.75-0.99      | 1 (ref)         |
|                     | 1-1.49         | 1.35(1.11,1.64) | 1.34(1.10,1.62) | 1.30(1.07,1.58) | 1.27(1.05,1.55) | 1.28(1.05,1.56) |
|                     | 1.5+           | 1.38(1.08,1.75) | 1.48(1.16,1.89) | 1.39(1.09,1.78) | 1.35(1.06,1.74) | 1.36(1.06,1.75) |
| Hip fracture        |                |                 |                 |                 |                 |                 |
|                     | <0.5           | 0.57(0.39,0.83) | 0.63(0.43,0.92) | 0.64(0.44,0.94) | 0.65(0.44,0.95) | 0.65(0.44,0.95) |
|                     | 0.5-0.74       | 0.90(0.69,1.19) | 0.92(0.70,1.21) | 0.92(0.70,1.22) | 0.93(0.71,1.23) | 0.94(0.71,1.24) |
|                     | 0.75-0.99      | 1 (ref)         |

|        |                 |                 |                 |                 |                 |
|--------|-----------------|-----------------|-----------------|-----------------|-----------------|
| 1-1.49 | 1.33(0.98,1.80) | 1.37(1.02,1.84) | 1.33(0.99,1.79) | 1.29(0.95,1.74) | 1.29(0.95,1.75) |
| 1.5+   | 1.37(0.95,1.98) | 1.60(1.11,2.32) | 1.52(1.05,2.21) | 1.45(1.00,2.11) | 1.46(1.00,2.13) |

---

*Model 1: unadjusted [stratified by DOPPS phase and country]*

*Model 2: + demographics: age, sex, Black race, dialysis vintage*

*Model 3: + 13 DOPPS 'standard' comorbid conditions*

*Model 4: + single pool Kt/V, body mass index, serum albumin, serum creatinine, hemoglobin*

*Model 5: + MBD treatments (calcium-based phosphate binder, non-calcium-based phosphate binder, active vitamin D, calcimimetics) and markers (serum phosphate, serum calcium)*

*ALP = alkaline phosphatase; CV = cardiovascular; PTH = parathyroid hormone.*

### Supplementary Table S3

Akaike Information Criteria for adjusted Cox models including normalized PTH vs. normalized ALP

| Outcome             | AIC for PTH | AIC for ALP |
|---------------------|-------------|-------------|
| All cause mortality | 63787.291   | 63639.740   |
| CV mortality        | 23035.357   | 22992.370   |
| Non-CV mortality    | 40998.315   | 40896.212   |
| Any fracture        | 11571.600   | 11526.407   |
| Hip fracture        | 4544.006    | 4530.547    |

*AIC = Akaike Information Criteria; ALP = alkaline phosphatase; CV = cardiovascular; PTH = parathyroid hormone. 'AIC for PTH' represents the AIC for the adjusted Cox regression model with normalized PTH as the exposure variable and 'AIC for ALP' represents the AIC for the adjusted Cox regression model with normalized ALP as the exposure variable; lower AIC is indicative of a better model fit, and thus reflects a better set of predictors for the outcome. A lower AIC for all 5 outcomes in this table demonstrates that normalized ALP was a better predictor than normalized PTH for every outcome.*



### Supplementary Table S4

Sample size in each cell of the analysis (Figure 2) of the combined associations between normalized ALP, normalized PTH, and time-to-even clinical outcomes

| normalized<br>PTH | normalized ALP |          |           |          |      | Total |
|-------------------|----------------|----------|-----------|----------|------|-------|
|                   | <0.5           | 0.5-0.74 | 0.75-0.99 | 1.0-1.49 | 1.5+ |       |
| <1                | 1182           | 1621     | 755       | 445      | 171  | 4174  |
| 1-3.9             | 3285           | 5558     | 3090      | 1932     | 755  | 14620 |
| 4-5.9             | 891            | 1863     | 1153      | 868      | 338  | 5113  |
| 6-8.9             | 537            | 1236     | 909       | 716      | 325  | 3723  |
| 9+                | 363            | 944      | 851       | 1047     | 866  | 4071  |
| Total             | 6258           | 11222    | 6758      | 5008     | 2455 | 31701 |

*ALP = alkaline phosphatase; PTH = parathyroid hormone.*

**Modified STROBE Statement**—checklist of items that should be included in reports of observational studies (Cohort/Cross-sectional and case-control studies)

|                              | Item No | Recommendation                                                                                                                                  | Page No. |
|------------------------------|---------|-------------------------------------------------------------------------------------------------------------------------------------------------|----------|
| <b>Title and abstract</b>    | 1       | (a) Indicate the study's design with a commonly used term in the title or the abstract                                                          | 1-2      |
|                              |         | (b) Provide in the abstract an informative and balanced summary of what was done and what was found                                             | 3        |
| <b>Introduction</b>          |         |                                                                                                                                                 |          |
| Background/rationale         | 2       | Explain the scientific background and rationale for the investigation being reported                                                            | 4        |
| Objectives                   | 3       | State specific objectives, including any prespecified hypotheses                                                                                | 4        |
| <b>Methods</b>               |         |                                                                                                                                                 |          |
| Study design                 | 4       | Present key elements of study design early in the paper                                                                                         | 5-7      |
| Setting                      | 5       | Describe the setting, locations, and relevant dates, including periods of recruitment, exposure, follow-up, and data collection                 | 5-7      |
| Participants                 | 6       | (a) <i>Cohort study</i> —Give the eligibility criteria, and the sources and methods of selection of participants. Describe methods of follow-up | 5-7      |
| Variables                    | 7       | Clearly define all outcomes, exposures, predictors, potential confounders, and effect modifiers. Give diagnostic criteria, if applicable        | 5-7      |
| Data sources/<br>measurement | 8*      | For each variable of interest, give sources of data and details of methods of assessment (measurement).                                         | 5-7      |
| Bias                         | 9       | Describe any efforts to address potential sources of bias                                                                                       | 5-7      |
| Study size                   | 10      | Explain how the study size was arrived at (if applicable)                                                                                       | 5-7      |

|                        |     |                                                                                                                                                                                                   |                                           |
|------------------------|-----|---------------------------------------------------------------------------------------------------------------------------------------------------------------------------------------------------|-------------------------------------------|
| Quantitative variables | 11  | Explain how quantitative variables were handled in the analyses. If applicable, describe which groupings were chosen and why                                                                      | 5-7                                       |
| Statistical methods    | 12  | (a) Describe all statistical methods, including those used to control for confounding                                                                                                             | 5-7                                       |
|                        |     | (b) Describe any methods used to examine subgroups and interactions                                                                                                                               | 5-7                                       |
|                        |     | (c) Explain how missing data were addressed                                                                                                                                                       | 5-7                                       |
|                        |     | (d) <i>Cohort study</i> —If applicable, explain how loss to follow-up was addressed                                                                                                               | 5-7                                       |
|                        |     | (e) Describe any sensitivity analyses                                                                                                                                                             |                                           |
| <b>Results</b>         |     |                                                                                                                                                                                                   |                                           |
| Participants           | 13* | (a) Report numbers of individuals at each stage of study—eg numbers potentially eligible, examined for eligibility, confirmed eligible, included in the study, completing follow-up, and analyzed | 8                                         |
|                        |     | (c) <b>Use of a flow diagram</b>                                                                                                                                                                  | 5, 6, and Supplementary Figure S1         |
| Descriptive data       | 14* | (a) Give characteristics of study participants (eg demographic, clinical, social) and information on exposures and potential confounders                                                          | 7, 8, Table 1, and Supplementary Table S1 |
|                        |     | (b) Indicate number of participants with missing data for each variable of interest                                                                                                               | 5-8, and Supplementary Figure S1          |
|                        |     | (c) <i>Cohort study</i> —Summarise follow-up time (eg, average and total amount)                                                                                                                  | 8-9                                       |
| Outcome data           | 15* | <i>Cohort study</i> —Report numbers of outcome events or summary measures over time                                                                                                               | 8-9                                       |
| Main results           | 16  | (a) Give unadjusted estimates and, if applicable, confounder-adjusted estimates and their precision (eg, 95% confidence interval). Make clear which                                               | Figure 1                                  |

confounders were adjusted for and why they were included

---

|                |    |                                                                                                |  |
|----------------|----|------------------------------------------------------------------------------------------------|--|
| Other analyses | 17 | Report other analyses done—eg analyses of subgroups and interactions, and sensitivity analyses |  |
|----------------|----|------------------------------------------------------------------------------------------------|--|

---

|                   |    |                                                                                                                                                                            |       |
|-------------------|----|----------------------------------------------------------------------------------------------------------------------------------------------------------------------------|-------|
| <b>Discussion</b> |    |                                                                                                                                                                            |       |
| Key results       | 18 | Summarise key results with reference to study objectives                                                                                                                   | 10-13 |
| Limitations       | 19 | Discuss limitations of the study, taking into account sources of potential bias or imprecision. Discuss both direction and magnitude of any potential bias                 | 10-11 |
| Interpretation    | 20 | Give a cautious overall interpretation of results considering objectives, limitations, multiplicity of analyses, results from similar studies, and other relevant evidence | 10-13 |
| Generalisability  | 21 | Discuss the generalisability (external validity) of the study results                                                                                                      | 10-13 |

---

\*Give information separately for cases and controls in case-control studies and, if applicable, for exposed and unexposed groups in cohort and cross-sectional studies.

**Note:** An Explanation and Elaboration article discusses each checklist item and gives methodological background and published examples of transparent reporting. The STROBE checklist is best used in conjunction with this article (freely available on the Web sites of PLoS Medicine at <http://www.plosmedicine.org/>, Annals of Internal Medicine at <http://www.annals.org/>, and Epidemiology at <http://www.epidem.com/>). Information on the STROBE Initiative is available at [www.strobe-statement.org](http://www.strobe-statement.org).
